# Supplementary material for: Gene‐specific correlation of RNA and protein levels in human cells and tissues
Source: PubMed Central journal article supplement (PMC5081484; doi:10.15252/msb.20167144), 2016-10-26
Supplement: MSB-12-883-s011.pdf [file MSB-12-883-s011.pdf]

## Gene-specific correlation of RNA and protein levels in human cells and tissues

Fredrik Edfors, Frida Danielsson, Björn M. Hallström, Lukas Käll, Emma Lundberg, Fredrik Pontén, Björn Forsström and Mathias Uhlén

*Corresponding author: Mathias Uhlén, KTH - Royal Institute of Technology*

---

### Review timeline:

|                     |                   |
|---------------------|-------------------|
| Submission date:    | 05 July 2016      |
| Editorial Decision: | 01 August 2016    |
| Revision received:  | 08 August 2016    |
| Editorial Decision: | 26 August 2016    |
| Revision received:  | 05 September 2016 |
| Accepted:           | 15 September 2016 |

---

*Editor: Maria Polychronidou*

### Transaction Report:

(Note: With the exception of the correction of typographical or spelling errors that could be a source of ambiguity, letters and reports are not edited. The original formatting of letters and referee reports may not be reflected in this compilation.)

1st Editorial Decision

01 August 2016

---

Thank you again for submitting your work to Molecular Systems Biology. We have now heard back from two of the three referees who agreed to evaluate your study. Unfortunately, after a couple of reminders we have not yet received a report from reviewer #3. Since the recommendations of the other two referees are similar, I prefer to make a decision now rather than further delaying the process. As you will see below, the reviewers acknowledge that you address an important topic. However, they raise a number of concerns, which should be carefully addressed in a revision of the manuscript.

The referees' recommendations are quite clear, so there is no need to repeat all the points listed below. One of the more fundamental issues refers to the need to include further analyses on the protein-RNA relationships for different genes. Reviewer #1 (point 1) provides constructive suggestions and as s/he points out, such analyses would significantly enhance the impact of the study.

-----

### REFeree COMMENTS

Reviewer #1:

The authors present a new view on the long-standing discussion on the relationship between protein and mRNA concentrations: the variation of the relationship for individual genes across mammalian

tissues. To do so, precise concentration measurements are taken for 55 genes across tissues and cell lines. The manuscript is well-written and the idea is solid. It is of broad interest and therefore suitable for a journal like Molecular Systems Biology.

However, before supporting publication of the work, I would like to see several criticisms addressed.

#### MAJOR

1. The novel aspect of the work is the assessment of the protein-to-RNA relationship for a given gene ACROSS tissues. The finding is very interesting, but is, in my view, still underrepresented in the current version of the m/s. Much of the figures/results/discussion is about correlation of protein and mRNA within tissues/cell lines - that has been looked at before and many times. The novelty of this work lies in the plots in Figure 3 and should, in my opinion, be much more analyzed. For example: which genes have an extremely constant protein-to-RNA relationship, which vary? What would the functions be of these genes, are there any general conclusions regarding to which genes vary and which don't? Is it perhaps correlated with their overall abundance? I.e. highly abundant genes vary less (since it's harder)? Is there perhaps a certain tissue/cell type in which the correlation is consistently off? In Figure 3 for the three genes, the 3rd tissue from the right seems to be consistently different. What is the reason for this? Technical? Or perhaps cells in this tissue are arrested in a specific cell cycle stage and therefore the histone normalization is thrown off? Or, at a per gene basis - is there evidence for additional post-transcriptional regulation in a specific tissue for genes where the protein-to-mRNA relationship deviates from the average in one case? What could be the biology behind this? I would urge the authors to go deeper this route of analysis.

2. Relatedly - I would like to have the presentation/discussion MUCH more turned around the biology behind this. I don't think protein-per-RNA ratios and a prediction factor are that interesting, what is much more biologically relevant is the fact that the gross translation/protein degradation rate appears to be set at a per-gene basis (perhaps due to sequence, length, etc properties of the gene) and does not vary across tissues. That is, the order of magnitude in translation/protein degradation of a gene is constant. However, smaller changes (two-fold etc) still exist across tissues, confirming hypotheses drawn from many other studies that suggest that post-transcriptional regulation FINE-TUNES gene expression levels (see recent reviews, e.g. in Cell by Aebersold or earlier in Nature Rev Genetics by Marcotte). The work presented here is consistent with this and adds another dimension.

3. Relatedly - it might be nice to cite Uri Alon et al.'s work on Fold-Change-Detection in bacterial chemotaxis. It seems related to this whole discussion and a nice new twist.

4. The dynamic range of concentrations of RNA or protein cover 3-4 or 5 orders of magnitude. That is ok, but still only a small part of what is seen. In particular low abundance proteins seem to be missing in the analysis, and it needs to be discussed what is expected for them. Perhaps this relationship (see above) does not hold true for them, also since it is easier for the cell to change the concentration of low-abundance proteins. Limitations of the findings need to be discussed. - On a related note, it needs to be discussed to what extent the currently selected proteins are representative in their expression nature.

5. In Table S8, the PTR numbers for A549, HepG2, HeLa, MCF7, SHSY5Y for LCP1 gene are 56, 158, 138, 430, 245. These are 5 out of 20 tissue/cell line in total with the values less than  $5 \cdot 10^2$ . However, in the Figure 4A shows a minimum larger than  $10^4$ . The authors need to explain and justify why/how these lower values have been left out and that this is not cherry picking.

6. The normalization based on histones is one way to normalize for abundance, but it can have biases: some tissues might have cells arrested in a specific cell cycle stage etc etc. At least for some extreme cases (see other suggestions), I would strongly suggest to validate with alternative assessments. The DNA content can be measured per ug tissue, the total protein and RNA content too. The number of cells per ug or ul can also be estimated, at least for some tissues. Since much of the conclusions rely on this normalization, it needs to be rock-solid.

#### MINOR

1. There is no Figure 2A in the document.
2. The axes labels of Figure 2 are cut. The axis ranges should also be adjusted to not show so much empty space.
3. In Figure 3, what the different colors are representing in the immunofluorescence staining? The immunohistochemistry staining needs to be explained in more detail.
4. Figure 5 is at low resolution and hardly legible.
5. In Table S8, second column, the authors mention "Order in Fig. 1B" - what does that mean?

Reviewer #2:

This manuscript describes the use of PRM data to test how well transcript levels correlate with protein abundance across tissues.

1. Differing conclusions. Conclusion described in Abstract is decidedly unexciting and certainly not novel but this really under-sells the real conclusion from the data - that transcript and protein levels do not correlate very well at all unless one has a gene-specific correction factor.
2. Absolute copy number per cell - the authors could do more to explain why knowing this is important, apart from just having more knowledge. They make a big deal out of it but it seems like a sidebar to their main purpose of correlating RNA and protein levels.

Articles (of the grammatical variety) and prepositions missing in several instances, particularly preceding numbers (e.g., in Abstract it should be "to close to A million copies", in Results it should be "almost hundredS OF millions of copies")

1st Revision - authors' response

08 August 2016

We are happy that the reviewers found our manuscript is well-written and of broad interest. We find the issues and comments raised by reviewers relevant and we have prepared a revised manuscript taken these suggestions into account.

In the following are point-to-point comments regarding the issues brought up by the reviewers:

*Reviewer #1 comments:*

Reviewer: 1. The novel aspect of the work is the assessment of the protein-to-RNA relationship for a given gene ACROSS tissues. The finding is very interesting, but is, in my view, still underrepresented in the current version of the m/s. Much of the figures/results/discussion is about correlation of protein and mRNA within tissues/cell lines - that has been looked at before and many times. The novelty of this work lies in the plots in Figure 3 and should, in my opinion, be much more analyzed. For example: which genes have an extremely constant protein-to-RNA relationship, which vary? What would the functions be of these genes, are there any general conclusions regarding to which genes vary and which don't? Is it perhaps correlated with their overall abundance? I.e. highly abundant genes vary less (since it's harder)? Is there perhaps a certain tissue/cell type in which the correlation is consistently off? In Figure 3 for the three genes, the 3rd tissue from the right seems to be consistently different. What is the reason for this? Technical? Or perhaps cells in this tissue are arrested in a specific cell cycle stage and therefore the histone normalization is thrown off? Or, at a per gene basis - is there evidence for additional post-transcriptional regulation in a specific tissue for genes where the protein-to-mRNA relationship deviates from the average in one case? What could be the biology behind this? I would urge the

authors to go deeper this route of analysis.

Comment: This is a relevant comment and we have extended the analysis regarding Figure 3 considerably. It is important to note that we do not want to make too much generalized statements based on the relative small number of genes analyzed, but we have extended the analysis of the determined RTP-ratios both in terms of protein length and subcellular localization (Including two new Supplementary Figures).

Reviewer: 2. Relatedly - I would like to have the presentation/discussion MUCH more turned around the biology behind this. I don't think protein-per-RNA ratios and a prediction factor are that interesting, what is much more biologically relevant is the fact that the gross translation/protein degradation rate appears to be set at a per-gene basis (perhaps due to sequence, length, etc properties of the gene) and does not vary across tissues. That is, the order of magnitude in translation/protein degradation of a gene is constant. However, smaller changes (two-fold etc) still exist across tissues, confirming hypotheses drawn from many other studies that suggest that post-transcriptional regulation FINE-TUNES gene expression levels (see recent reviews, e.g. in Cell by Aebersold or earlier in Nature Rev Genetics by Marcotte). The work presented here is consistent with this and adds another dimension.

Comment: Again, a relevant comment and we have extended the discussion to include more discussions on subcellular localization. For example, proteins localized to the extracellular space and centrosome have higher RTP-ratios. In contrast, proteins annotated and associated to the nucleolus have lower RTP ratios.

Reviewer: 3. Relatedly - it might be nice to cite Uri Alon et al.'s work on Fold-Change-Detection in bacterial chemotaxis. It seems related to this whole discussion and a nice new twist.

Comment: The paper by Alon et al regarding bacterial chemotaxis is indeed very interesting, but the topic quite unrelated to the present work. We agree that a discussion on the mechanism of bacterial chemotaxis might give a extended view, but it is hard to give this observation justice without a lengthy discussion and we do not want to reach to far away from the scope of our work.

Reviewer: 4. The dynamic range of concentrations of RNA or protein cover 3-4 or 5 orders of magnitude. That is ok, but still only a small part of what is seen. In particular low abundance proteins seem to be missing in the analysis, and it needs to be discussed what is expected for them. Perhaps this relationship (see above) does not hold true for them, also since it is easier for the cell to change the concentration of low-abundance proteins. Limitations of the findings need to be discussed. - On a related note, it needs to be discussed to what extent the currently selected proteins are representative in their expression nature.

Comment: This is an interesting point. We have added a few sentences regarding this to the Discussion.

Reviewer: 5. In Table S8, the PTR numbers for A549, HepG2, HeLa, MCF7, SHSY5Y for LCP1 gene are 56, 158, 138, 430, 245. These are 5 out of 20 tissue/cell line in total with the values less than  $5 \cdot 10^2$  500. However, in the Figure 4A shows a minimum larger than  $10^4$ . The authors need to explain and justify why/how these lower values have been left out and that this is not cherry picking.

Comment: This has been corrected.

Reviewer: 6. The normalization based on histones is one way to normalize for abundance, but it can have biases: some tissues might have cells arrested in a specific cell cycle stage etc etc. At least for some extreme cases (see other suggestions), I would strongly suggest to validate with alternative assessments. The DNA content can be measured per ug tissue, the total protein and RNA content too. The number of cells per ug or ul can also be estimated, at least for some tissues. Since much of the conclusions rely on this normalization, it needs to be rock-solid.

Comment: We agree, but it is not easy to do experimentally due to the uncertainty to related DNA or RNA amounts to the samples size analyzed on the mass spectrometry instrument. We believe that the use of internal standards for absolute quantification of histones further improves the previous work on histone normalization performed by Wisniewski et al.

MINOR

Reviewer: 1. There is no Figure 2A in the document.

Comment: The wrong Figure 2 was submitted. Figure 2A is now included in the revised manuscript.

Reviewer: 2. The axes labels of Figure 2 are cut. The axis ranges should also be adjusted to not show so much empty space.

Comment: See previous comment.

Reviewer: 3. In Figure 3, what the different colors are representing in the immunofluorescence staining? The immunohistochemistry staining needs to be explained in more detail.

Comment: More explanation has been included in the figure legend.

Reviewer: 4. Figure 5 is at low resolution and hardly legible.

Comment: A new Figure 5 has been submitted with high resolution images.

Reviewer: 5. In Table S8, second column, the authors meantion "Order in Fig. 1B" - what does that mean?

Comment: The explanation has been clarified.

*Reviewer #2 comments:*

Reviewer: 1. Differing conclusions. Conclusion described in Abstract is decidedly unexciting and certainly not novel but this really under-sells the real conclusion from the data - that transcript and protein levels do not correlate very well at all unless one has a gene-specific correction factor.

Comment: The abstract has been revised.

Reviewer: 2. Absolute copy number per cell - the authors could do more to explain why knowing this is important, apart from just having more knowledge. They make a big deal out of it but it seems like a sidebar to their main purpose of correlating RNA and protein levels.

Comment: The Discussion regarding this has been extended.

Reviewer: 3. Articles (of the grammatical variety) and prepositions missing in several instances, particularly preceding numbers (e.g., in Abstract it should be "to close to A million copies", in Results it should be "almost hundredS OF millions of copies")

Comments: these two typographical errors have been corrected.

2nd Editorial Decision

26 August 2016

Thank you for submitting your revised manuscript to Molecular Systems Biology. We have now heard back from reviewer #1 who was asked to evaluate the study. As you will see below, s/he thinks that the study has been improved. However, s/he lists some remaining concerns, which we

would ask you to address in a minor revision.

While we think that inclusion of qPCR data as an independent validation of the RNA-seq data is not mandatory, we would not object to the inclusion of such data i.e. in case they are already available. In line with the comments of reviewer #1, we would ask you to include a more detailed explanation of the histone normalization approach and to extend the description/discussion on the findings related to the relationship between the conversion factor and protein function, length etc. Also, we agree with reviewer #1 that it should be explicitly mentioned in the abstract that the gene-specific conversion factor is independent of the tissue-type.

-----  
 REFEREE COMMENTS

Reviewer #1:

Edfors et al. present a revised manuscript in which they addressed many of the reviewers' comments. The text is clearer to read and has a consistent story. However: while I do like the scope of the work and I consider the main findings important for the field and a broader readership, but I disagree with the authors on the emphasis and presentation of the results.

Because of this discrepancy, I list reasons below for and against publication of the work in its current form:

PROS (no particular order)

1. Protein concentration measurements are of highest-quality. While many studies have examined the protein-vs-mRNA question, having such a good dataset can finally exclude some technical biases.
2. The 55 proteins/mRNAs span a wide range of concentrations, and have been selected based on their variation in mRNA expression across tissues. Both very nice and interesting findings.
3. The number of tissues examined is larger than in other studies.
4. The normalization (using histones) is as thorough and high-quality as it can be.
5. The finding that the protein-per-mRNA ratio is set by gene TYPE rather than by TISSUE is relevant for the field, as it means that, when measuring mRNA and estimating protein concentrations from that, it is sufficient to know an approximate conversion factor, as this study shows that the conversion factor is relatively constant across tissues.

CONS (no particular order)

1. The RNA seq data does not have orthogonal validation (e.g. qPCR).
2. The histone normalization is not compared to alternative approaches. Given that in principle, the authors do the same thing as the Nature paper 2014 (ref 16), they \*really\* need to explain and demonstrate why their current dataset is of much higher quality.
3. Presentation/analysis still has flaws:
  1. Typos and redundancy in use of terms/words.
  2. The 55 genes were selected based on them being intracellular, but the enriched category in the RTP analysis is EXTRA-cellular proteins. Explain/discuss?
  4. Insufficient analysis of the results (see above). I do not think it is enough to report a conversion factor - its interpretation with respect to its variability across gene functions, tissues, gene length, protein abundance is part of the discussion. I had several suggestions in my first review, and the authors examined function (discussed briefly, but not interpreted) and length (only in Supplement). I am not so happy with how the authors followed-through with it. The new version of the manuscript has some good interpretation of the result, but I think it's still hidden. E.g p. 9 "However, our data implies that these gene-specific differences in RNA to protein ratio are independent of cell or tissue and thus a "universal" RTP-ratio can be determined that can be used across cells of different origin and stage for a given gene product. "
  5. Along the lines of comment 4, Abstract and Introduction still focus on solving the debate on protein-vs-RNA correlation, and I think the paper doesn't really answer that question. The current version of the paper basically says "protein and mRNA correlate better across genes if a gene-

specific conversion factor is applied". But so what? I find it much more interesting that this gene-specific conversion factor is somewhat constant across tissues and therefore gene TYPE is the major determinant for protein-vs-mRNA ratio rather than tissue. Minor note: With that result in mind, an analysis of a biased set of 55 genes is absolutely fine (and the authors don't have to apologize for using few genes).

6. Minor: apart from spiking in the peptides before tryptic digest, what is 'novel' or 'new' about the PRM method? What \*is\* truly new is that it has been used for many genes and many tissues in a consistent study.

2nd Revision - authors' response

05 September 2016

We are pleased with the comments and suggestions both by the reviewer and the editor. We find the suggestions relevant and we have prepared a revised manuscript taken these suggestions into account. During uploading of all files, we re-examined all calculations and found a small error in the use of one of the software algorithms used in the Skyline package calculating the protein standards. This only affects the quantification of our standards and do not affect the cross-tissue and cell line RTP-analysis, but this affects the absolute numbers reported in the manuscript. Therefore, we have now updated the tables and figures accordingly.

**Reviewer #1 comments:**

1. The RNA seq data does not have orthogonal validation (e.g. qPCR).

Several studies have shown a correlation between qPCR and RNA-Seq and this was not the scope of this investigation. Examples of such publications are: Su, Łabaj, Li et al. (2014) A comprehensive assessment of RNA-seq accuracy, reproducibility and information content by the sequencing Quality control consortium, *Nature Biotechnology* and Nagalakshmi et al, (2008) The Transcriptional Landscape of the Yeast Genome Defined by RNA Sequencing, *Science*).

2. The histone normalization is not compared to alternative approaches. Given that in principle, the authors do the same thing as the Nature paper 2014 (ref 16), they \*really\* need to explain and demonstrate why their current dataset is of much higher quality.

This has been addressed in the introduction as we included a relevant reference to Ahrné et al (2003).

3. Presentation/analysis still has flaws:

1. Typos and redundancy in use of terms/words.
2. The 55 genes were selected based on them being intracellular, but the enriched category in the RTP analysis is EXTRA-cellular proteins. Explain/discuss?

Extra-cellular is membrane-bound in this sense, and we have clarified this in the revised manuscript by changing the wording to "non-secreted" instead of intracellular.

4. Insufficient analysis of the results (see above). I do not think it is enough to report a conversion factor - its interpretation with respect to its variability across gene functions, tissues, gene length, protein abundance is part of the discussion. I had several suggestions in my first review, and the authors examined function (discussed briefly, but not interpreted) and length (only in Supplement). I am not so happy with how the authors followed-through with it. The new version of the manuscript has some good interpretation of the result, but I think it's still hidden. E.g p. 9 "However, our data implies that these gene-specific differences in RNA to protein ratio are independent of cell or tissue and thus a "universal" RTP-ratio can be determined that can be used across cells of different origin and stage for a given gene product. "

We are hesitant to include a more in-depth discussion on protein function since the number of genes in each category is rather limited.

5. Along the lines of comment 4, Abstract and Introduction still focus on solving the debate on protein-vs-RNA correlation, and I think the paper doesn't really answer that question. The current version of the paper basically says "protein and mRNA correlate better across genes if a gene-specific conversion factor is applied". But so what? I find it much more interesting that this gene-specific conversion factor is somewhat constant across tissues and therefore gene TYPE is the major determinant for protein-vs-mRNA ratio rather than tissue. Minor note: With that result in mind, an analysis of a biased set of 55 genes is absolutely fine (and the authors don't have to apologize for using few genes).

We agree.

6. Minor: apart from spiking in the peptides before tryptic digest, what is 'novel' or 'new' about the PRM method? What *\*is\** truly new is that it has been used for many genes and many tissues in a consistent study.

This has been updated in the manuscript. More emphasis on the novelty of this approach that is comparing genes across several cell lines and tissues, quantified by spiked in internal standards.

With these changes in the revised manuscript, I hope you find the manuscript suitable for publication in Molecular Systems Biology.



## MOLECULAR SYSTEMS BIOLOGY

**YOU MUST COMPLETE ALL CELLS WITH A PINK BACKGROUND ↓**

Corresponding Author Name: Mathias Uhlén

Manuscript Number: MSB-16-7144RR

### Reporting Checklist For Life Sciences Articles

This checklist is used to ensure good reporting standards and to improve the reproducibility of published results. These guidelines are consistent with the Principles and Guidelines for Reporting Preclinical Research issued by the NIH in 2014. Please follow the journal's authorship guidelines in preparing your manuscript (see link list at top right).

#### A- Figures

##### 1. Data

The data shown in figures should satisfy the following conditions:

- the data were obtained and processed according to the field's best practice and are presented to reflect the results of the experiments in an accurate and unbiased manner.
- figure panels include only data points, measurements or observations that can be compared to each other in a scientifically meaningful way.
- graphs include clearly labeled error bars only for independent experiments and sample sizes where the application of statistical tests is warranted (error bars should not be shown for technical replicates)
- when n is small (n < 5), the individual data points from each experiment should be plotted alongside an error bar.
- Source Data should be included to report the data underlying graphs. Please follow the guidelines set out in the authorship guidelines on Data Presentation (see link list at top right).

##### 2. Captions

Each figure caption should contain the following information, for each panel where they are relevant:

- a specification of the experimental system investigated (eg cell line, species name).
- the assay(s) and method(s) used to carry out the reported observations and measurements
- an explicit mention of the biological and chemical entity(ies) that are being measured.
- an explicit mention of the biological and chemical entity(ies) that are altered/ varied/ perturbed in a controlled manner.
- the exact sample size (n) for each experimental group/condition, given as a number, not a range;
- a description of the sample collection allowing the reader to understand whether the samples represent technical or biological replicates (including how many animals, litters, cultures, etc.).
- a statement of how many times the experiment shown was independently replicated in the laboratory.
- definitions of statistical methods and measures:
  - common tests, such as t-test (please specify whether paired vs. unpaired), simple x<sup>2</sup> tests, Wilcoxon and Mann-Whitney tests, can be unambiguously identified by name only, but more complex techniques should be described in the methods section;
  - are tests one-sided or two-sided?
  - are there adjustments for multiple comparisons?
  - exact statistical test results, e.g., P values = x but not P values < x;
  - definition of 'center values' as median or average;
  - definition of error bars as s.d. or s.e.m.

Any descriptions too long for the figure legend should be included in the methods section and/or with the source data.

Please ensure that the answers to the following questions are reported in the manuscript itself. We encourage you to include a specific subsection in the methods section for statistics, reagents, animal models and human subjects.

In the pink boxes below, provide the page number(s) of the manuscript draft or figure legend(s) where the information can be located. Every question should be answered. If the question is not relevant to your research, please write NA (non applicable).

### USEFUL LINKS FOR COMPLETING THIS FORM

<http://msb.embopress.org/authorguide>  
<http://www.antibodypedia.com>  
<http://1degreebio.org>  
<http://www.equator-network.org/reporting-guidelines/improving-biosci>  
  
<http://grants.nih.gov/grants/olaw/olaw.htm>  
<http://www.mrc.ac.uk/Ourresearch/Ethicsresearchguidance/Useofanimals>  
<http://ClinicalTrials.gov>  
<http://www.consort-statement.org>  
<http://www.consort-statement.org/checklists/view/32-consort/66-title>  
  
<http://www.equator-network.org/reporting-guidelines/reporting-recomr>  
  
<http://datadryad.org>  
  
<http://figshare.com>  
  
<http://www.ncbi.nlm.nih.gov/gap>  
  
<http://www.ebi.ac.uk/ega>  
  
<http://biomodels.net/>  
  
<http://biomodels.net/miriam/>  
<http://jii.biochem.sun.ac.za>  
[http://oba.od.nih.gov/biosecurity/biosecurity\\_documents.html](http://oba.od.nih.gov/biosecurity/biosecurity_documents.html)  
<http://www.selectagents.gov/>

#### B- Statistics and general methods

Please fill out these boxes ↓

|                                                                                                                                                                                         |     |
|-----------------------------------------------------------------------------------------------------------------------------------------------------------------------------------------|-----|
| 1.a. How was the sample size chosen to ensure adequate power to detect a pre-specified effect size?                                                                                     | NA  |
| 1.b. For animal studies, include a statement about sample size estimate even if no statistical methods were used.                                                                       | NA  |
| 2. Describe inclusion/exclusion criteria if samples or animals were excluded from the analysis. Were the criteria pre-established?                                                      | NA  |
| 3. Were any steps taken to minimize the effects of subjective bias when allocating animals/samples to treatment (e.g. randomization procedure)? If yes, please describe.                | NA  |
| For animal studies, include a statement about randomization even if no randomization was used.                                                                                          | NA  |
| 4.a. Were any steps taken to minimize the effects of subjective bias during group allocation or/and when assessing results (e.g. blinding of the investigator)? If yes please describe. | No  |
| 4.b. For animal studies, include a statement about blinding even if no blinding was done                                                                                                | NA  |
| 5. For every figure, are statistical tests justified as appropriate?                                                                                                                    | Yes |
| Do the data meet the assumptions of the tests (e.g., normal distribution)? Describe any methods used to assess it.                                                                      | Yes |
| Is there an estimate of variation within each group of data?                                                                                                                            | Yes |
| Is the variance similar between the groups that are being statistically compared?                                                                                                       | Yes |

#### C- Reagents

|                                                                                                                                                                                                                                                                                                                              |           |
|------------------------------------------------------------------------------------------------------------------------------------------------------------------------------------------------------------------------------------------------------------------------------------------------------------------------------|-----------|
| 6. To show that antibodies were profiled for use in the system under study (assay and species), provide a citation, catalog number and/or clone number, supplementary information or reference to an antibody validation profile. e.g., Antibodypedia (see link list at top right), 1DegreeBio (see link list at top right). | NA        |
| 7. Identify the source of cell lines and report if they were recently authenticated (e.g., by STR profiling) and tested for mycoplasma contamination.                                                                                                                                                                        | Table EV1 |

\* for all hyperlinks, please see the table at the top right of the document

#### D- Animal Models

|                                                                                                                                                                                                                                                                                                                                                                                                                 |    |
|-----------------------------------------------------------------------------------------------------------------------------------------------------------------------------------------------------------------------------------------------------------------------------------------------------------------------------------------------------------------------------------------------------------------|----|
| 8. Report species, strain, gender, age of animals and genetic modification status where applicable. Please detail housing and husbandry conditions and the source of animals.                                                                                                                                                                                                                                   | NA |
| 9. For experiments involving live vertebrates, include a statement of compliance with ethical regulations and identify the committee(s) approving the experiments.                                                                                                                                                                                                                                              | NA |
| 10. We recommend consulting the ARRIVE guidelines (see link list at top right) (PLoS Biol. 8(6), e1000412, 2010) to ensure that other relevant aspects of animal studies are adequately reported. See author guidelines, under 'Reporting Guidelines' (see link list at top right). See also: NIH (see link list at top right) and MRC (see link list at top right) recommendations. Please confirm compliance. | NA |

#### E- Human Subjects

|                                                                                                                                                                                                                                                                                                    |                                                                                                                                                                                                                                                                                                                           |
|----------------------------------------------------------------------------------------------------------------------------------------------------------------------------------------------------------------------------------------------------------------------------------------------------|---------------------------------------------------------------------------------------------------------------------------------------------------------------------------------------------------------------------------------------------------------------------------------------------------------------------------|
| 11. Identify the committee(s) approving the study protocol.                                                                                                                                                                                                                                        | Ethical statement in                                                                                                                                                                                                                                                                                                      |
| 12. Include a statement confirming that informed consent was obtained from all subjects and that the experiments conformed to the principles set out in the WMA Declaration of Helsinki and the Department of Health and Human Services Belmont Report.                                            | All human tissue samples used in the present study were anonymized in accordance with approval and advisory report from the Uppsala Ethical Review Board (Reference # 2002-577, 2005-338 and 2007-159 (protein) and # 2011-473 (RNA)), and consequently the need for informed consent was waived by the ethics committee. |
| 13. For publication of patient photos, include a statement confirming that consent to publish was obtained.                                                                                                                                                                                        | NA                                                                                                                                                                                                                                                                                                                        |
| 14. Report any restrictions on the availability (and/or on the use) of human data or samples.                                                                                                                                                                                                      | NA                                                                                                                                                                                                                                                                                                                        |
| 15. Report the clinical trial registration number (at ClinicalTrials.gov or equivalent), where applicable.                                                                                                                                                                                         | NA                                                                                                                                                                                                                                                                                                                        |
| 16. For phase II and III randomized controlled trials, please refer to the CONSORT flow diagram (see link list at top right) and submit the CONSORT checklist (see link list at top right) with your submission. See author guidelines, under 'Reporting Guidelines' (see link list at top right). | NA                                                                                                                                                                                                                                                                                                                        |
| 17. For tumor marker prognostic studies, we recommend that you follow the REMARK reporting guidelines (see link list at top right). See author guidelines, under 'Reporting Guidelines' (see link list at top right).                                                                              | NA                                                                                                                                                                                                                                                                                                                        |

#### F- Data Accessibility

|                                                                                                                                                                                                                                                                                                                                                                                                                                                                                                                                                                                                                                                                                                   |                                                                                                                                                                                                                                                                                                                                                                                                       |
|---------------------------------------------------------------------------------------------------------------------------------------------------------------------------------------------------------------------------------------------------------------------------------------------------------------------------------------------------------------------------------------------------------------------------------------------------------------------------------------------------------------------------------------------------------------------------------------------------------------------------------------------------------------------------------------------------|-------------------------------------------------------------------------------------------------------------------------------------------------------------------------------------------------------------------------------------------------------------------------------------------------------------------------------------------------------------------------------------------------------|
| 18. Provide accession codes for deposited data. See author guidelines, under 'Data Deposition' (see link list at top right).<br><br>Data deposition in a public repository is mandatory for:<br>a. Protein, DNA and RNA sequences<br>b. Macromolecular structures<br>c. Crystallographic data for small molecules<br>d. Functional genomics data<br>e. Proteomics and molecular interactions                                                                                                                                                                                                                                                                                                      | <a href="http://www.ncbi.nlm.nih.gov/bioproject/PRJNA183192">http://www.ncbi.nlm.nih.gov/bioproject/PRJNA183192</a> ,<br><a href="http://www.ebi.ac.uk/arrayexpress/experiments/E-MTAB-1733/">http://www.ebi.ac.uk/arrayexpress/experiments/E-MTAB-1733/</a> ,<br><a href="http://www.proteinatlas.org/download/prm_cells_tissues.zip">http://www.proteinatlas.org/download/prm_cells_tissues.zip</a> |
| 19. Deposition is strongly recommended for any datasets that are central and integral to the study; please consider the journal's data policy. If no structured public repository exists for a given data type, we encourage the provision of datasets in the manuscript as a Supplementary Document (see author guidelines under 'Expanded View' or in unstructured repositories such as Dryad (see link list at top right) or Figshare (see link list at top right)).                                                                                                                                                                                                                           | See above                                                                                                                                                                                                                                                                                                                                                                                             |
| 20. Access to human clinical and genomic datasets should be provided with as few restrictions as possible while respecting ethical obligations to the patients and relevant medical and legal issues. If practically possible and compatible with the individual consent agreement used in the study, such data should be deposited in one of the major public access-controlled repositories such as dbGAP (see link list at top right) or EGA (see link list at top right).                                                                                                                                                                                                                     | NA                                                                                                                                                                                                                                                                                                                                                                                                    |
| 21. As far as possible, primary and referenced data should be formally cited in a Data Availability section:<br><br>Examples:<br><b>Primary Data</b><br>Wetmore KM, Deuschbauer AM, Price MN, Arkin AP (2012). Comparison of gene expression and mutant fitness in <i>Shewanella oneidensis</i> MR-1. Gene Expression Omnibus GSE39462<br><b>Referenced Data</b><br>Huang J, Brown AF, Lei M (2012). Crystal structure of the TRBD domain of TERT and the CR4/5 of TR. Protein Data Bank 4O26<br>AP-MS analysis of human histone deacetylase interactions in CEM-T cells (2013). PRIDE PXD000208                                                                                                  | NA                                                                                                                                                                                                                                                                                                                                                                                                    |
| 22. Computational models that are central and integral to a study should be shared without restrictions and provided in a machine-readable form. The relevant accession numbers or links should be provided. When possible, standardized format (SBML, CellML) should be used instead of scripts (e.g. MATLAB). Authors are strongly encouraged to follow the MIRIAM guidelines (see link list at top right) and deposit their model in a public database such as Biocompare (see link list at top right) or JWS Online (see link list at top right). If computer source code is provided with the paper, it should be deposited in a public repository or included in supplementary information. | NA                                                                                                                                                                                                                                                                                                                                                                                                    |

#### G- Dual use research of concern

|                                                                                                                                                                                                                                                                                               |    |
|-----------------------------------------------------------------------------------------------------------------------------------------------------------------------------------------------------------------------------------------------------------------------------------------------|----|
| 23. Could your study fall under dual use research restrictions? Please check biosecurity documents (see link list at top right) and list of select agents and toxins (APHIS/CDC) (see link list at top right). According to our biosecurity guidelines, provide a statement only if it could. | No |
|-----------------------------------------------------------------------------------------------------------------------------------------------------------------------------------------------------------------------------------------------------------------------------------------------|----|
